# Supplementary material for: Machine learning multi-omics analysis reveals cancer driver dysregulation in pan-cancer cell lines compared to primary tumors
Source: PubMed Central journal article supplement (PMC9747808; doi:10.1038/s42003-022-04075-4), 2022-12-13
Supplement: 42003_2022_4075_MOESM3_ESM.pdf [file 42003_2022_4075_MOESM3_ESM.pdf]

## Description of Additional Supplementary Files

**File Name:** Supplementary Data 1

**Description:** Top 10% of genes derived from SVM analysis, GSEA results, and results from subset SVM analyses.

**File Name:** Supplementary Data 2

**Description:** miRNA, lncRNA and coding gene relationships.

**File Name:** Supplementary Data 3

**Description:** Cell type markers and differential expression analysis for single cell data.

**File Name:** Supplementary Data 4

**Description:** miRNA and Cytoscape network input.
